# Supplementary material for: An Empirical Test of Convergent Evolution in Rhodopsins
Source: PubMed Central journal article supplement — Mol Biol Evol. 2013 Sep 27;31(1):85–95. doi: 10.1093/molbev/mst171 (PMC3879442; doi:10.1093/molbev/mst171), 2013-09-27
Supplement: supp_mst171_Supplementary_Figures.pdf [file supp_mst171_Supplementary_Figures.pdf]

Supplemental Figures

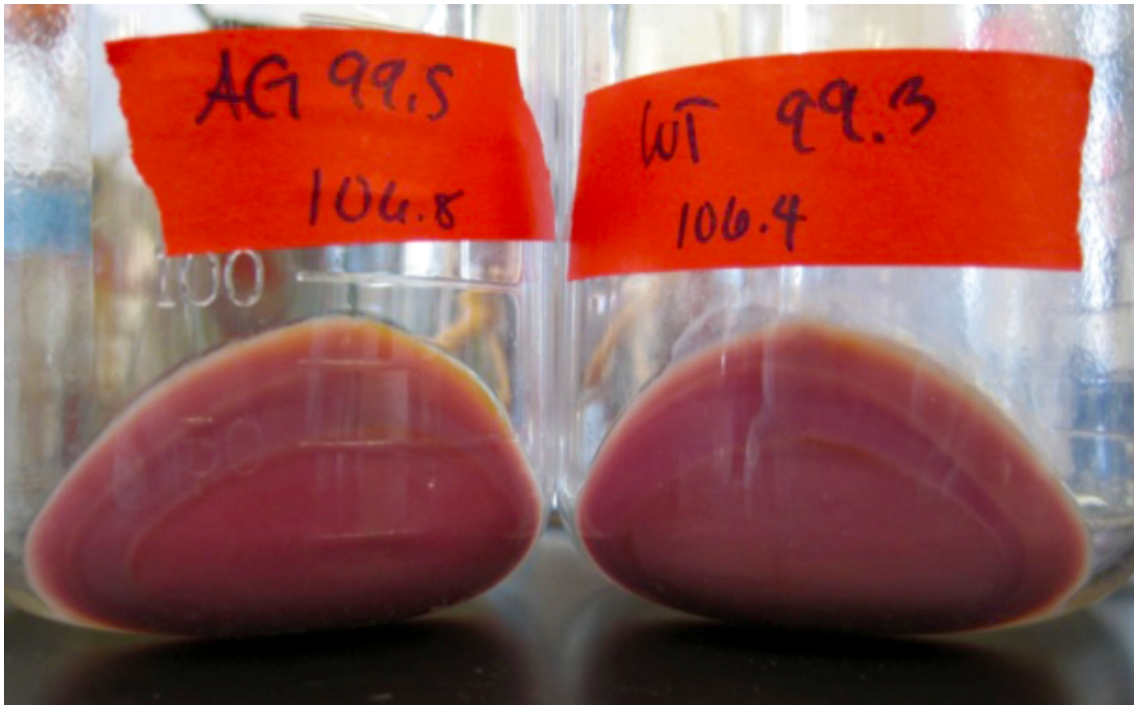

Figure S1: Colored bacterial pellets. *E. coli* cell pellets expressing GBCDEFA permutation mutant (left) and wild-type *H. turkmenica* bacteriorhodopsin (right). Correct targeting to the membrane and folding of a mutant is indicated by a WT-like pink coloration.

## Folding Mechanisms

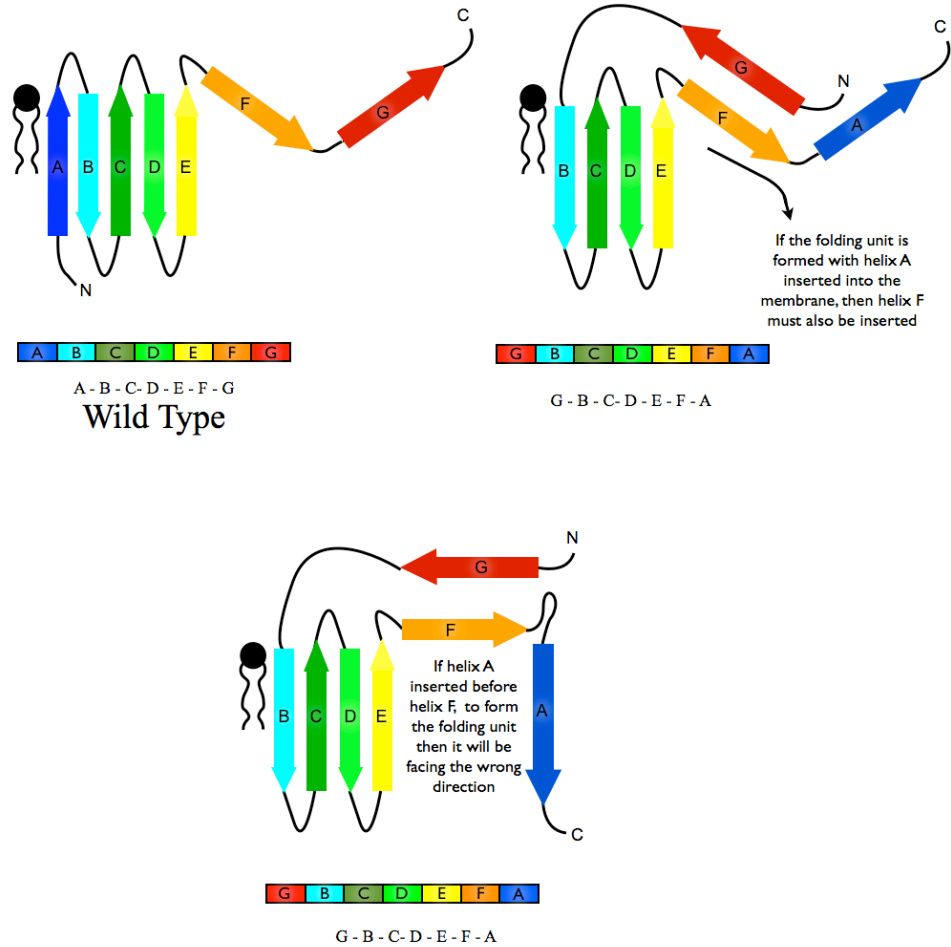

Figure S2: Proposed folding mechanisms for bR. Upper left: Conventional folding mechanism for wild-type bR, in which helices F and G cannot insert into the membrane until helices A-E have already inserted and associated. Upper right: Our GBCDEFA mutant cannot follow the proposed wild-type folding mechanism, since it is physically impossible for helices A-E to insert and associate before helix F is inserted. Lower middle: If helix A in fact inserts and associates with helices B-E before F is inserted, then helix A will have the wrong polarity in the membrane, and helix F will be left in solution.

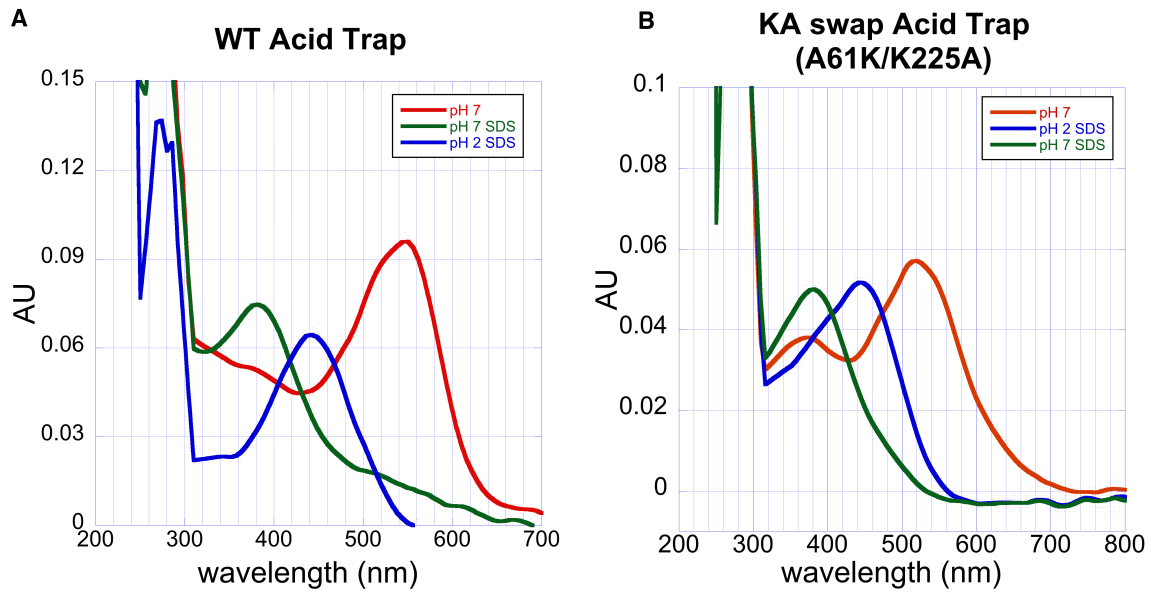

Figure S3: Acid trap experiments for (A) WT bR and (B) the A61K/K225A lysine swap mutant. For each protein, the absorbance spectra for three conditions are overlaid: in red, native protein at pH 7; in green, denatured protein at pH 7 with 2% SDS; in blue, denatured protein at pH 2 with 2% SDS. Native protein at neutral pH displays a distinctive red-shifted absorbance maximum near 550 nm. When the protein is denatured at neutral pH, the lysine-retinal Schiff base linkage hydrolyzes, free retinal is exposed to water, and it displays a 380 nm absorbance maximum. On the other hand, when protein is denatured under acidic conditions, the Schiff base remains protonated and does not hydrolyze. However, since the protein is denatured, the covalently bound retinal is no longer bound in the protein's retinal-binding pocket, the retinal is exposed to aqueous solution, and it displays an absorbance maximum of about 440 nm.

Table S1: Individual helix sequences, as diagrammed in Figure 2. Sequences of each helix as determined using homology to solved bR structures.

| Helix Name | Sequence                                       |
|------------|------------------------------------------------|
| Helix A    | AALAPPMAATVGPESIWLWIGTIGMTLGTLYFVGRGRGVRDR     |
| Helix B    | KMQEFYIITIFITTTIAAAMYFAMATGFGVTEVM             |
| Helix C    | VGDEALTIYWARYADWLFTTPLLILLDLSLLAG              |
| Helix D    | ANRNTIATLIGLDVFMIGTGAI AALSST                  |
| Helix E    | PGTRIAWWAISTGALLALLYVLVGTLS ENARNR             |
| Helix F    | APEVASLFGRLRNLVIALWFLYPVVWILGTEGTF             |
| Helix G    | GILPLYWETA AFMVLDSLAKVGFVILLQSRSVL ERVATPTAAPT |

Table S2: Mutant sequences, related to Figure 2. Sequences of wild-type and permuted bacteriorhodopsin constructs. Sequence numbering is based on the wt protein.

| Mutant                  | Sequence                                                                                                                                                                                                                                                                           | Sequence numbers (Helix-Name_Residue-numbers_linker) |
|-------------------------|------------------------------------------------------------------------------------------------------------------------------------------------------------------------------------------------------------------------------------------------------------------------------------|------------------------------------------------------|
| wt_Ht_bacteriorhodopsin | MCCAALAPPMAATVGPESIWLWIGTIGMTLGTLYFVGRGRGVRDRKMQEFYIIITIFITTTIAAAMYFAMATGFGVTEVMVGDEALTIYWARYADWLFTTPLLDDLSLLAGANRNTIATLIGLDVFMIGTGAI AALSSTPGTRIAWWAISTGALLALLYVLVGTLSENARNRAPEVASLFGRLRLVIALWFLYPVVWILGTEGTFGILPLYWETA AFMVL DLSAKVGFV ILLQSRSVLERVATPTAAPT                      |                                                      |
| GBCDEFA                 | ILPLYWETA AFMVL DLSAKVGFV ILLQSRSVLERGVRDRKMQEFYIIITIFITTTIAAAMYFAMATGFGVTEVMVGDEALTIYWARYADWLFTTPLLDDLSLLAGANRNTIATLIGLDVFMIGTGAI AALSSTPGTRIAWWAISTGALLALLYVLVGTLSENARNRAPEVASLFGRLRLVIALWFLYPVVWILGTEGTFGSGAALAPPMAATVGPESIWLWIGTIGMTLGTLYFVGRGRGVRDR                           | G_207-241_g<br>B-F_42-207_sg<br>A_4-45               |
| CDEFGBA                 | GVTEVMVGDEALTIYWARYADWLFTTPLLDDLSLLAGANRNTIATLIGLDVFMIGTGAI AALSSTPGTRIAWWAISTGALLALLYVLVGTLSENARNRAPEVASLFGRLRLVIALWFLYPVVWILGTEGTFGILPLYWETA AFMVL DLSAKVGFV ILLQSRSVLERVGRDRKMQEFYIIITIFITTTIAAAMYFAMATGFGSGAALAPPMAATVGPESIWLWIGTIGMTLGTLYFVGRGRGVRDR                          | C-G_73-241_g<br>B_42-72_ggsg<br>A_4-45               |
| GFABCDE                 | MILPLYWETA AFMVL DLSAKVGFV ILLQSRSVLERVATPTAAPTPEVASLFGRLRLVIALWFLYPVVWILGTEGTFSGAALAPPMAATVGPESIWLWIGTIGMTLGTLYFVGRGRGVRDRKMQEFYIIITIFITTTIAAAMYFAMATGFGVTEVMVGDEALTIYWARYADWLFTTPLLDDLSLLAGANRNTIATLIGLDVFMIGTGAI AALSSTPGTRIAWWAISTGALLALLYVLVGTLSENARNRA                       | G_207-250<br>F_172-205_sg<br>A-E_4-172               |
| CDEFABG                 | MGVTEVMVGDEALTIYWARYADWLFTTPLLDDLSLLAGANRNTIATLIGLDVFMIGTGAI AALSSTPGTRIAWWAISTGALLALLYVLVGTLSENARNRAPEVASLFGRLRLVIALWFLYPVVWILGTEGTFSGAALAPPMAATVGPESIWLWIGTIGMTLGTLYFVGRGRGVRDRKMQEFYIIITIFITTTIAAAMYFAMATGFGVTEVMVGGGILPLYWETA AFMVL DLSAKVGFV ILLQSRSVLERVATPTAAPT             | C-F_73-206_sg<br>A_4-80_ggsgg<br>G_206-250           |
| FG_WALP23_ABCDE         | MGSRAPEVASLFGRLRLVIALWFLYPVVWILGTEGTFGILPLYWETA AFMVL DLSAKVGFV ILLQSRSVLERGSGWLLALALALALALALALALWASGAALAPPMAATVGPESIWLWIGTIGMTLGTLYFVGRGRGVRDRKMQEFYIIITIFITTTIAAAMYFAMATGFGVTEVMVGDEALTIYWARYADWLFTTPLLDDLSLLAGANRNTIATLIGLDVFMIGTGAI AALSSTPGTRIAWWAISTGALLALLYVLVGTLSENARNRGSC | FG_171-241 W<br>ABCDE_4-171                          |
| DEFG_WALP23_ABC         | MGANRNTIATLIGLDVFMIGTGAI AALSSTPGTRIAWWAISTGALLALLYVLVGTLSENARNRAPEVASLFGRLRLVIALWFLYPVVWILGTEGTFGILPLYWETA AFMVL DLSAKVGFV ILLQSRSVLERGSGWLLALALALALALALALWASGAALAPPMAATVGPESIWLWIGTIGMTLGTLYFVGRGRGVRDRKMQEFYIIITIFITTTIAAAMYFAMATGFGVTEVMVGDEALTIYWARYADWLFTTPLLDDLSLLAG        | DEFG_110-241<br>W ABC_4-110<br>TEV site              |
| BCDEFG_WALP23_A         | MVRDRKMQEFYIIITIFITTTIAAAMYFAMATGFGVTEVMVGDEALTIYWARYADWLFTTPLLDDLSLLAGMGNRNTIATLIGLDVFMIGTGAI AALSSTPGTRIAWWAISTGALLALLYVLVGTLSENARNRAPEVASLFGRLRLVIALWFLYPVVWILGTEGTFGILPLYWETA AFMVL DLSAKVGFV ILLQSRSVLERGSGWLLALALALALALALALWASGAALAPPMAATVGPESIWLWIGTIGMTLGTLYFVGRGRGVRDR    | BCDEFG_42-241<br>W A_4-45 TEV                        |
